# Supplementary material for: Insecticides Resistance Status of An. gambiae in Areas of Varying Agrochemical Use in Côte D’Ivoire
Source: Hindawi journal article supplement (doi:10.1155/2018/2874160), 2018-10-08
Supplement: f1 [file 2874160.f1.pdf]

**TEST DE SENSIBILITE DES VECTEURS DE PALUDISME AUX  
INSECTICIDES**

**Localities**

**Abengourou**

**Date**

**5/16/2016**

**Espèce vectrice**

***An. gambiae***

**Insecticide testé**

**Deltamethrin 0,05%**

**Replicat**

**4**

|                       | TEMPERATURE |          | HUMIDITE RELATIVE |          |
|-----------------------|-------------|----------|-------------------|----------|
|                       | AU DEBUT    | A LA FIN | AU DEBUT          | A LA FIN |
| PERIODE D'EXPOSITION  | 25,2°C      | 24,9°C   | 53%               | 54%      |
| PERIODE D'OBSERVATION |             |          |                   |          |

|                                 | Tube 1 | Tube 2 | Tube 3 | Tube 4 | Total Test | Témoin 1 |
|---------------------------------|--------|--------|--------|--------|------------|----------|
| Nombre de moustiques exposés    | 25     | 25     | 24     | 23     | 97         | 25       |
| Nombre de moustiques Kd après : |        |        |        |        |            |          |
| 5 mn                            | 0      | 0      | 0      | 0      | 0          | 0        |
| 8 mn                            | 0      | 0      | 0      | 0      | 0          | 0        |
| 10 mn                           | 0      | 0      | 0      | 0      | 0          | 0        |
| 13 mn                           | 0      | 0      | 0      | 0      | 0          | 0        |
| 15 mn                           | 0      | 0      | 0      | 0      | 0          | 0        |
| 18 mn                           | 0      | 0      | 0      | 0      | 0          | 0        |
| 20 mn                           | 0      | 0      | 0      | 0      | 0          | 0        |
| 23 mn                           | 0      | 0      | 0      | 0      | 0          | 0        |
| 25 mn                           | 0      | 0      | 0      | 0      | 0          | 0        |
| 28 mn                           | 0      | 0      | 0      | 0      | 0          | 0        |
| 30 mn                           | 0      | 0      | 0      | 0      | 0          | 0        |
| 33 mn                           | 0      | 0      | 0      | 1      | 1          | 0        |
| 35 mn                           | 0      | 0      | 1      | 1      | 2          | 0        |
| 38 mn                           | 0      | 1      | 1      | 3      | 5          | 0        |
| 40 mn                           | 1      | 2      | 2      | 3      | 8          | 0        |
| 43 mn                           | 1      | 2      | 2      | 4      | 9          | 0        |
| 45 mn                           | 1      | 3      | 3      | 4      | 11         | 0        |
| 48 mn                           | 1      | 3      | 3      | 4      | 11         | 0        |
| 50 mn                           | 1      | 4      | 3      | 4      | 12         | 0        |
| 53 mn                           | 4      | 4      | 3      | 4      | 15         | 0        |
| 55 mn                           | 4      | 5      | 3      | 4      | 16         | 0        |
| 58 mn                           | 4      | 5      | 3      | 5      | 17         | 0        |
| 60 mn                           | 4      | 6      | 4      | 6      | 20         | 0        |
| 80 mn                           |        |        |        |        | 0          | 0        |

|                                 |   |   |   |   |       |       |
|---------------------------------|---|---|---|---|-------|-------|
| Nombre de Morts après 24 heures | 1 | 1 | 0 | 1 | 3     | 0     |
| Mortalité observée              |   |   |   |   | 3.09% | 0.00% |
| Mortalité corrigée              |   |   |   |   | 3.09% |       |

**TEST DE SENSIBILITE DES VECTEURS DE PALU  
INSECTICIDES**

|                          |                        |          |          |
|--------------------------|------------------------|----------|----------|
| <b>Localities</b>        | <b>Abengourou</b>      |          |          |
| <b>Date</b>              | <b>5/16/2016</b>       |          |          |
| <b>Espèce vectrice</b>   | <b>An. gambiae</b>     |          |          |
| <b>Insecticide testé</b> | <b>Bendiocarb 0,1%</b> |          |          |
| <b>Replicat</b>          | <b>4</b>               |          |          |
|                          | TEMPERATURE            |          | HUMIDITE |
|                          | AU DEBUT               | A LA FIN | AU DEBUT |
| PERIODE D'EXPOSITION     | 24.9                   |          | 52%      |
| PERIODE D'OBSERVATION    |                        |          |          |

| Témoïn 2 |                                 | Tube 1 | Tube 2 | Tube 3 | Tube 4 |
|----------|---------------------------------|--------|--------|--------|--------|
| 25       | Nombre de moustiques exposés    | 25     | 24     | 25     | 23     |
|          | Nombre de moustiques Kd après : |        |        |        |        |
| 0        | 5 mn                            | 0      | 0      | 0      | 0      |
| 0        | 8 mn                            | 0      | 0      | 0      | 0      |
| 0        | 10 mn                           | 0      | 0      | 0      | 0      |
| 0        | 13 mn                           | 0      | 0      | 0      | 0      |
| 0        | 15 mn                           | 0      | 0      | 0      | 0      |
| 0        | 18 mn                           | 0      | 0      | 0      | 0      |
| 0        | 20 mn                           | 0      | 0      | 0      | 0      |
| 0        | 23 mn                           | 0      | 0      | 0      | 0      |
| 0        | 25 mn                           | 0      | 0      | 0      | 0      |
| 0        | 28 mn                           | 0      | 0      | 0      | 0      |
| 0        | 30 mn                           | 0      | 0      | 0      | 0      |
| 0        | 33 mn                           | 0      | 0      | 0      | 0      |
| 0        | 35 mn                           | 0      | 0      | 0      | 0      |
| 0        | 38 mn                           | 0      | 0      | 0      | 0      |
| 0        | 40 mn                           | 0      | 0      | 0      | 0      |
| 0        | 43 mn                           | 0      | 0      | 0      | 0      |
| 0        | 45 mn                           | 0      | 2      | 0      | 0      |
| 0        | 48 mn                           | 0      | 3      | 0      | 0      |
| 0        | 50 mn                           | 0      | 3      | 0      | 0      |
| 0        | 53 mn                           | 0      | 3      | 2      | 0      |
| 0        | 55 mn                           | 0      | 3      | 2      | 0      |
| 0        | 58 mn                           | 4      | 4      | 2      | 1      |
| 0        | 60 mn                           | 4      | 4      | 2      | 3      |
| 0        | 80 mn                           |        |        |        |        |

|       |
|-------|
| 0     |
| 0.00% |
|       |

|                                 |   |   |   |   |
|---------------------------------|---|---|---|---|
| Nombre de Morts après 24 heures | 5 | 6 | 3 | 2 |
| Mortalité observée              |   |   |   |   |
| Mortalité corrigée              |   |   |   |   |

**DISME AUX**

|          |
|----------|
| RELATIVE |
| A LA FIN |
|          |
|          |

| Total Test | Témoins 1 | Témoins 2 |
|------------|-----------|-----------|
| 97         | 25        | 24        |
|            |           |           |
| 0          | 0         | 0         |
| 0          | 0         | 0         |
| 0          | 0         | 0         |
| 0          | 0         | 0         |
| 0          | 0         | 0         |
| 0          | 0         | 0         |
| 0          | 0         | 0         |
| 0          | 0         | 0         |
| 0          | 0         | 0         |
| 0          | 0         | 0         |
| 0          | 0         | 0         |
| 0          | 0         | 0         |
| 0          | 0         | 0         |
| 0          | 0         | 0         |
| 0          | 0         | 0         |
| 0          | 0         | 0         |
| 0          | 0         | 0         |
| 0          | 0         | 0         |
| 0          | 0         | 0         |
| 2          | 0         | 0         |
| 3          | 0         | 0         |
| 3          | 0         | 0         |
| 5          | 0         | 0         |
| 5          | 0         | 0         |
| 11         | 0         | 0         |
| 13         | 0         | 0         |
| 0          | 0         | 0         |

**TEST DE SENSIBILITE  
AUX I**

|                       |                    |
|-----------------------|--------------------|
| Localities            | Abengourou         |
| Date                  | 5/19/2016          |
| Espèce vectrice       | <i>An. gambiae</i> |
| Insecticide testé     | DDT 4%             |
| Replicat              | 4                  |
|                       | TEMPERA            |
|                       | AU DEBUT           |
| PERIODE D'EXPOSITION  | 26°C               |
| PERIODE D'OBSERVATION |                    |

|                                 | Tube 1 | Tube 2 |
|---------------------------------|--------|--------|
| Nombre de moustiques exposés    | 25     | 24     |
| Nombre de moustiques Kd après : |        |        |
| 5 mn                            | 0      | 0      |
| 8 mn                            | 0      | 0      |
| 10 mn                           | 0      | 0      |
| 13 mn                           | 0      | 0      |
| 15 mn                           | 0      | 0      |
| 18 mn                           | 0      | 0      |
| 20 mn                           | 0      | 0      |
| 23 mn                           | 0      | 0      |
| 25 mn                           | 0      | 0      |
| 28 mn                           | 0      | 0      |
| 30 mn                           | 0      | 0      |
| 33 mn                           | 0      | 0      |
| 35 mn                           | 0      | 0      |
| 38 mn                           | 0      | 0      |
| 40 mn                           | 0      | 0      |
| 43 mn                           | 0      | 0      |
| 45 mn                           | 0      | 0      |
| 48 mn                           | 0      | 0      |
| 50 mn                           | 0      | 0      |
| 53 mn                           | 0      | 0      |
| 55 mn                           | 0      | 0      |
| 58 mn                           | 0      | 0      |
| 60 mn                           | 0      | 0      |
| 80 mn                           |        |        |

|        |       |       |
|--------|-------|-------|
| 16     | 0     | 0     |
| 16.49% | 0.00% | 0.00% |
| 16.49% |       |       |

|                                 |   |   |
|---------------------------------|---|---|
| Nombre de Morts après 24 heures | 0 | 0 |
| Mortalité observée              |   |   |
| Mortalité corrigée              |   |   |



|   |   |       |       |       |
|---|---|-------|-------|-------|
| 0 | 0 | 0     | 0     | 0     |
|   |   | 0.00% | 0.00% | 0.00% |
|   |   | 0.00% |       |       |

|                                 |
|---------------------------------|
| Nombre de Morts après 24 heures |
| Mortalité observée              |
| Mortalité corrigée              |



**TEST DE SENSIBILITE DES VECTEURS DE PALUDISME  
AUX INSECTICIDES**

|                                 |                                                                                             |          |                   |          |
|---------------------------------|---------------------------------------------------------------------------------------------|----------|-------------------|----------|
| Méthode<br>Insecticide<br>testé | <b>Abengourou</b><br><b>5/19/2016</b><br><b>An. gambiae</b><br><b>Malathion</b><br><b>4</b> |          |                   |          |
|                                 | TEMPERATURE                                                                                 |          | HUMIDITE RELATIVE |          |
|                                 | AU DEBUT                                                                                    | A LA FIN | AU DEBUT          | A LA FIN |
|                                 | POSITION                                                                                    | 25,9°C   | 25,5°C            | 62%      |
| OBSERVATION                     |                                                                                             |          |                   |          |

| Tube 1 | Tube 2 | Tube 3 | Tube 4 | Total Test | Témoin 1 | Témoin 2 |
|--------|--------|--------|--------|------------|----------|----------|
| 25     | 25     | 25     | 25     | 100        | 25       | 25       |
|        |        |        |        |            |          |          |
| 0      | 0      | 0      | 0      | 0          | 0        | 0        |
| 0      | 0      | 0      | 0      | 0          | 0        | 0        |
| 0      | 0      | 0      | 0      | 0          | 0        | 0        |
| 0      | 0      | 0      | 0      | 0          | 0        | 0        |
| 0      | 0      | 0      | 0      | 0          | 0        | 0        |
| 0      | 0      | 0      | 0      | 0          | 0        | 0        |
| 0      | 1      | 5      | 1      | 7          | 0        | 0        |
| 3      | 4      | 6      | 5      | 18         | 0        | 0        |
| 8      | 9      | 10     | 5      | 32         | 0        | 0        |
| 9      | 12     | 11     | 8      | 40         | 0        | 0        |
| 10     | 16     | 14     | 12     | 52         | 0        | 0        |
| 12     | 16     | 15     | 14     | 57         | 0        | 0        |
| 17     | 20     | 21     | 14     | 72         | 0        | 0        |
| 18     | 21     | 22     | 14     | 75         | 0        | 0        |
| 18     | 21     | 22     | 17     | 78         | 0        | 0        |
| 18     | 22     | 24     | 18     | 82         | 0        | 0        |
| 19     | 24     | 24     | 20     | 87         | 0        | 0        |
| 21     | 24     | 24     | 22     | 91         | 0        | 0        |
| 21     | 24     | 24     | 22     | 91         | 0        | 0        |
| 22     | 24     | 24     | 22     | 92         | 0        | 0        |
| 22     | 25     | 24     | 23     | 94         | 0        | 0        |
| 23     | 25     | 24     | 23     | 95         | 0        | 0        |
|        |        |        |        | 0          | 0        | 0        |

|    |    |    |    |         |       |       |
|----|----|----|----|---------|-------|-------|
| 25 | 25 | 25 | 25 | 100     | 0     | 1     |
|    |    |    |    | 100.00% | 0.00% | 4.00% |
|    |    |    |    | 100.00% |       |       |
